# Supplementary material
Source: publisher figshare collection journal article supplement (https://geolsoc.figshare.com/ndownloader/files/5421692)
Supplement: Supplementary file 1 [file 5421692]

Table DS3a. Fossil datum depths and ages (Gradstein et al., 2004 timescale) used for simple linear regression calculations for four
intervals of Hole 647A, using (http://mikescosmos.com/LinReg.php) for regression analysis. Two tie-point depth and age values
were determined for each interval using the regression equations, to calculate the sedimentation rates and to draw regression lines.
Hole 647A Simple Linear Regression Lines Using Selected Biostratigraphic Datums
			0.02443	26.71675		0.45017
Interval 4: 280-130 mbsf			http://mikescosmos.com/LinReg.php
Datum Number	Datum Type	Taxon	y = 0.02443 x + 26.71675			r = 0.45017
			Datum Depth	Mean Datum Age	Calculated Regression Age
62	LO	Synedra jouseana	185.51	32.1	31.2
61	HO	Turborotalia ampliapertura	195.45	30.4	31.5
60	HO	Isthmolithus recurvus	208.15	33.4	31.8
59	HO	Reticulofenestra umbilicus	214.9	32	32
58	HO	Sceptroneis pupa	220.57	32.2	32.1
57	LO	Sceptroneis pupa	225	32.2	32.2
56	HO	Chiloguembelina ototara	234.24	29.6	32.4
55	HO	Spiniferites manumii	235.62	31.6	32.5
54	HO	Ericsonia formosa	244.51	33	32.7
53	LO	Sphenolithus distentus	244.51	33.5	32.7
52	HO	Pseudohastigerina naguewichiensis	246.14	32.2	32.7
51	LO	Rhizosolenia gravida/oligoceanica	250.98	33.9	32.8
50	HO	Pseudohastigerina micra	269.75	33.9	33.3
						Sedimentation Rate
		regression line tie-point depth/age	215		32	m/m.y.	cm/.k.y.
		regression line tie-point depth/age	256		33	40.9	4.09
Interval 3: 400-250 mbsf			http://mikescosmos.com/LinReg.php
Datum Number	Datum Type	Taxon	y = 0.04447 x + 21.05120			r = 0.79953
			Datum Depth	Mean Datum Age	Calculated Regression Age
49	LO	Chiropteridium galea	282.46	33.6	33.6
48	LO	Spiniferites manumii	287.95	33.6	33.9
47	HO	Discoaster saipensis	289.79	34.3	33.9
46	HO	Turborotalia cerroazulensis	294.08	34	34.1
45	HO	Areosphaeridium diktyoplokum	304.35	33.4	34.6
44	HO	Reticulofenestra reticulata	304.95	35.5	34.6
43	HO	Areosphaeridium michoudii	308.81	35.4	34.8
42	HO	Heteraulacacysta porosa	308.81	36.2	34.8
41	HO	Discoaster barbadiensis	318.82	34.5	35.2
40	HO	Globigerinatheka index	329.21	34.5	35.7
39	HO	Cribroperidinium sp. 2 (Damassa et al., 1990)	343.14	35.7	36.3
38	HO	Phthanoperidinium distinctum	369.29	38.3	37.5
						Sedimentation Rate
		regression line tie-point depth/age	291		34	m/m.y.	cm/.k.y.
		regression line tie-point depth/age	360		37.1	22.5	2.25
Interval 2: 610-495 mbsf			http://mikescosmos.com/LinReg.php
Datum Number	Datum Type	Taxon	y = 0.01320 x + 33.77400			r = 0.44142
			Datum Depth	Mean Datum Age	Calculated Regression Age
37	HO	Diphyes colligerum	413.73	39.8	39.2
36	LO	Reticulofenestra bisecta (>10 �m)	452.08	39.9	39.7
35	LO	Globigerinatheka index	453.4	41.9	39.8
34	HO	Chiasmolithus solitus	453.42	38.8	39.8
33	HO	Acarinina mcgowrani	467.03	37.7	39.9
32	HO	Acarinina bullbrooki	467.03	39.8	39.9
31	HO	Acarinina collactea	477.68	37.4	40.1
30	HO	Turborotalia frontosa	477.68	38.8	40.1
29	LO	Svalbardella cooksoniae	485.89	40.9	40.2
28	HO	Wetzeliella ovalis	485.89	41.1	40.2
27	LO	Cribroperidinium sp. 2 (Damassa et al., 1990)	485.89	41.9	40.2
26	LO	Rhombodinium rhomboideum	501.83	39.4	40.4
25	LO	Wetzeliella ovalis	501.83	43.3	40.4
24	LO	Reticulofenestra reticulata	524.58	39.6	40.7
23	HO	Nannotetrina cristata	539.96	40.9	40.9
22	LO	Turborotalia pomeroli	569.42	41.5	41.3
21	LO	Phthanoperidinium distinctum	576.61	41.8	41.4
20	LO	Phthanoperidinium comatum	588.51	41.4	41.5
19	LO	Enneadocysta arcuata	599.31	41.5	41.7
						Sedimentation Rate
		regression line tie-point depth/age	433		39.5	m/m.y.	cm/.k.y.
		regression line tie-point depth/age	471		40	75.8	7.58
Interval 1: 700-600 mbsf			http://mikescosmos.com/LinReg.php
Datum Number	Datum Type	Taxon	y = 0.0819837 x + -3.21803			r = 0.89854
			Datum Depth	Mean Datum Age	Calculated Regression Age
12	HO	Eatonicysta ursulae	618.79	48.3	47.56
11	HO	Dracodinium pachydermum	620.28	46.3	47.68
10	HO	Charlesdowniea columna	624.43	48.6	48.02
9	LO	Cerebrocysta magna	632.66	48.3	48.69
8	LO	Diphyes ficusoides	632.66	49.6	48.69
7	LO	Dracodinium pachydermum	632.66	49.3	48.69
6	HO	Discoaster lodoensis	634.43	48	48.83
5	HO	Tribrachiatus orthostylus	653.34	51	50.38
4	OCC/LO (<)	Acarinina primitiva	661.8	51.6	51.07
3	LO	Acarinina collactea	661.8	48.9	51.07
2	LO	Discoaster lodoensis	675.96	52.9	52.23
1	LO	Tribrachiatus orthostylus	696.71	54	53.92
						Sedimentation Rate
		regression line tie-point depth/age	625		48.06	m/m.y.	cm/.k.y.
		regression line tie-point depth/age	650		50.11	12.2	1.22
GRADSTEIN, F.M., OGG, J.G., SMITH, A.G., AGTERBERG, F.P., BLEEKER, W., COOPER, R.A., DAVYDOV, V., GIBBARD, P., HINNOV, L.A., HOUSE, M.R., LOURENS, L., LUTERBACHER, H-P., MCARTHUR, J., MELCHIN, M.J., ROBB, L.J., SHERGOLD, J., VILLENEUVE, M., WARDLAW, B.R., ALI, J., BRINKHUIS, H., HILGEN, F.J., HOOKER, J., HOWARTH, R.J., KNOLL, A.H., LASKAR, J., MONECHI, S., POWELL, J., PLUMB, K.A., RAFI, I., ROEHL…
Table DS3b. Fossil datum depths and ages (Cande and Kent, 1995 timescale) used for simple linear regression calculations for four
intervals of Hole 647A, using (http://mikescosmos.com/LinReg.php) for regression analysis. Two tie-point depth and age values
were determined for each interval using the regression equations, to calculate the sedimentation rates and to draw regression lines.
Hole 647A Simple Linear Regression Lines Using Selected Biostratigraphic Datums
Interval 4: 280-130 mbsf			http://mikescosmos.com/LinReg.php
Datum Number	Datum Type	Taxon	y = 0.02411 x + 26.61231			r = 0.45650
			Datum Depth	Mean Datum Age	Calculated Regression Age
62	LO	Synedra jouseana	185.51	31.9	31.1
61	HO	Turborotalia ampliapertura	195.45	30.3	31.3
60	HO	Isthmolithus recurvus	208.15	33.2	31.6
59	HO	Reticulofenestra umbilicus	214.9	31.8	31.8
58	HO	Sceptroneis pupa	220.57	32	31.9
57	LO	Sceptroneis pupa	225	32	32
56	HO	Chiloguembelina ototara	234.24	29.5	32.3
55	HO	Spiniferites manumii	235.62	31.5	32.3
54	HO	Ericsonia formosa	244.51	32.8	32.5
53	LO	Sphenolithus distentus	244.51	33.3	32.5
52	HO	Pseudohastigerina naguewichiensis	246.14	32	32.5
51	LO	Rhizosolenia gravida/oligoceanica	250.98	33.7	32.7
50	HO	Pseudohastigerina micra	269.75	33.7	33.1
						Sedimentation Rate
		regression line tie-point depth/age	215		31.8	m/m.y.	cm/.k.y.
		regression line tie-point depth/age	256		32.8	41.5	4.15
Interval 3: 400-250 mbsf			http://mikescosmos.com/LinReg.php
Datum Number	Datum Type	Taxon	y = 0.04447 x + 21.05120			r = 0.79953
			Datum Depth	Mean Datum Age	Calculated Regression Age
49	LO	Chiropteridium galea	282.46	33.6	33.6
48	LO	Spiniferites manumii	287.95	33.6	33.9
47	HO	Discoaster saipensis	289.79	34.3	33.9
46	HO	Turborotalia cerroazulensis	294.08	34	34.1
45	HO	Areosphaeridium diktyoplokum	304.35	33.4	34.6
44	HO	Reticulofenestra reticulata	304.95	35.5	34.6
43	HO	Areosphaeridium michoudii	308.81	35.4	34.8
42	HO	Heteraulacacysta porosa	308.81	36.2	34.8
41	HO	Discoaster barbadiensis	318.82	34.5	35.2
40	HO	Globigerinatheka index	329.21	34.5	35.7
39	HO	Cribroperidinium sp. 2 (Damassa et al., 1990)	343.14	35.7	36.3
38	HO	Phthanoperidinium distinctum	369.29	38.3	37.5
						Sedimentation Rate
		regression line tie-point depth/age	291		34	m/m.y.	cm/.k.y.
		regression line tie-point depth/age	360		37.1	22.5	2.25
Interval 2: 610-495 mbsf			http://mikescosmos.com/LinReg.php
Datum Number	Datum Type	Taxon	y = 0.01317 x + 33.79302			r = 0.44153
			Datum Depth	Mean Datum Age	Calculated Regression Age
37	HO	Diphyes colligerum	413.73		39.24
36	LO	Reticulofenestra bisecta (>10 �m)	452.08		39.75
35	LO	Globigerinatheka index	453.4		39.76
34	HO	Chiasmolithus solitus	453.42		39.76
33	HO	Acarinina mcgowrani	467.03		39.94
32	HO	Acarinina bullbrooki	467.03		39.94
31	HO	Acarinina collactea	477.68		40.08
30	HO	Turborotalia frontosa	477.68		40.08
29	LO	Svalbardella cooksoniae	485.89		40.19
28	HO	Wetzeliella ovalis	485.89		40.19
27	LO	Cribroperidinium sp. 2 (Damassa et al., 1990)	485.89		40.19
26	LO	Rhombodinium rhomboideum	501.83		40.4
25	LO	Wetzeliella ovalis	501.83		40.4
24	LO	Reticulofenestra reticulata	524.58		40.7
23	HO	Nannotetrina cristata	539.96		40.9
22	LO	Turborotalia pomeroli	569.42		41.29
21	LO	Phthanoperidinium distinctum	576.61		41.39
20	LO	Phthanoperidinium comatum	588.51		41.54
19	LO	Enneadocysta arcuata	599.31		41.69
						Sedimentation Rate
		regression line tie-point depth/age	433		39.5	m/m.y.	cm/.k.y.
		regression line tie-point depth/age	471		40	75.93	7.59
Interval 1: 700-600 mbsf			http://mikescosmos.com/LinReg.php
Datum Number	Datum Type	Taxon	y = 0.0819837 x + -3.21803			r = 0.89854
			Datum Depth	Mean Datum Age	Calculated Regression Age
12	HO	Eatonicysta ursulae	618.79		47.51
11	HO	Dracodinium pachydermum	620.28		47.63
10	HO	Charlesdowniea columna	624.43		47.97
9	LO	Cerebrocysta magna	632.66		48.65
8	LO	Diphyes ficusoides	632.66		48.65
7	LO	Dracodinium pachydermum	632.66		48.65
6	HO	Discoaster lodoensis	634.43		48.79
5	HO	Tribrachiatus orthostylus	653.34		50.34
4	OCC/LO (<)	Acarinina primitiva	661.8		51.04
3	LO	Acarinina collactea	661.8		51.04
2	LO	Discoaster lodoensis	675.96		52.2
1	LO	Tribrachiatus orthostylus	696.71		53.9
						Sedimentation Rate
		regression line tie-point depth/age	625		48.02	m/m.y.	cm/.k.y.
		regression line tie-point depth/age	650		50.07	12.2	1.22
CANDE, S. C., & KENT, D.V. (1995), Revised calibration of the geomagnetic polarity timescale for the Late Cretaceous and Cenozoic. Journal of Geophysical Research, 100, 6093 � 6095. doi:10.1029/94JB03098.
